# Supplementary material for: Sustained antibacterial release of zwitterionic globular hyperbranched polymer dots intercalated into layered double hydroxides
Source: Royal Society of Chemistry journal article supplement (doi:10.1039/d4ra05587j), 2024-01-01
Supplement: d4ra05587j2.pdf [file d4ra05587j2.pdf]

## Supporting Information

### Sustained Antibacterial Release of Zwitterionic Globular Hyperbranched Polymer Dots Intercalated into Layered Double Hydroxides

Chun-Kuei Liu<sup>a</sup>, Fang-Yi Su<sup>a</sup>, Tzong-Yuan Juang<sup>b\*</sup>, Yung-Chuan Liu<sup>a\*</sup>

<sup>a</sup> Department of Chemical Engineering, National Chung Hsing University, 145 Xingda Rd., South Dist, Taichung, 40227, Taiwan

<sup>b</sup> Department of Cosmeceutics, China Medical University, Taichung, 40402, Taiwan

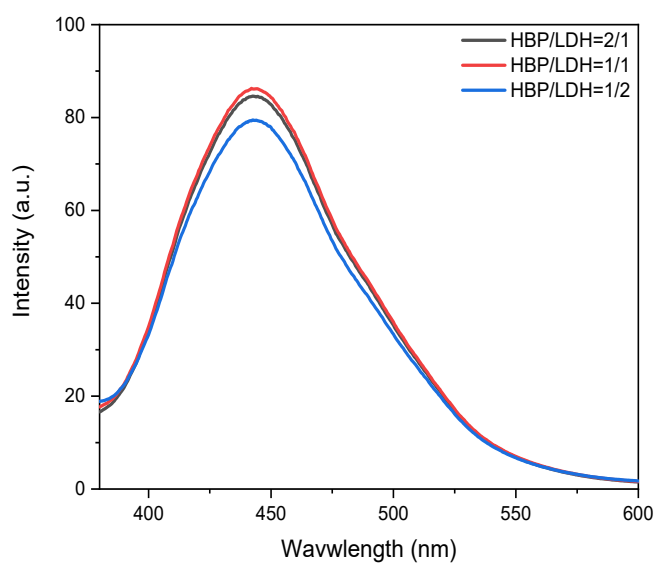

Figure S1. Photoluminescence of HBP/LDH (Ex: 360 nm).

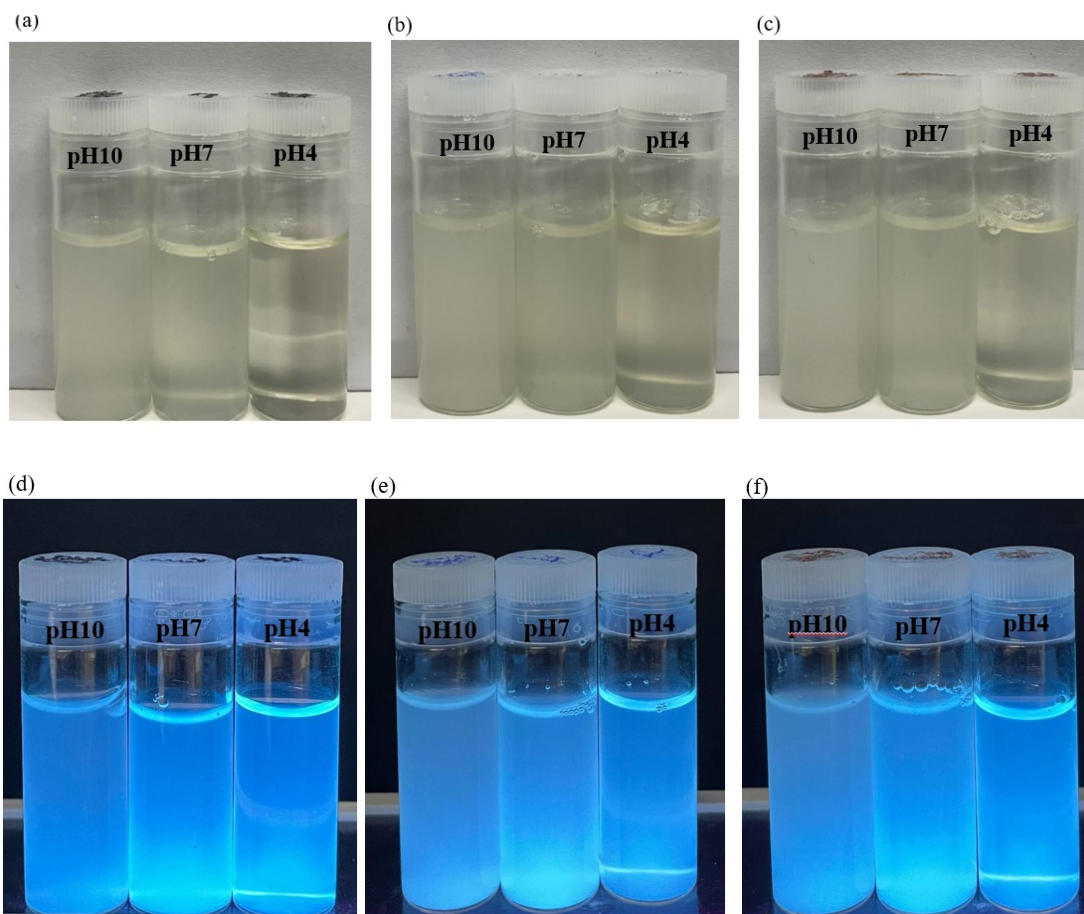

Figure S2. Appearance of HBP/LDH (w/w) = (a, d) 2/1, (b, e) 1/1, and (c, f) 1/2 in daylight and under UV light, respectively.

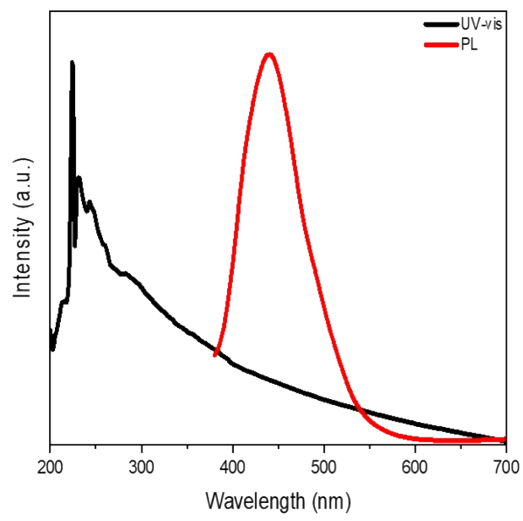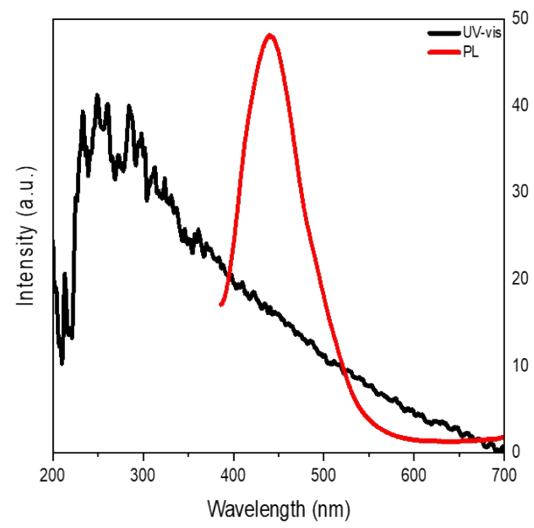

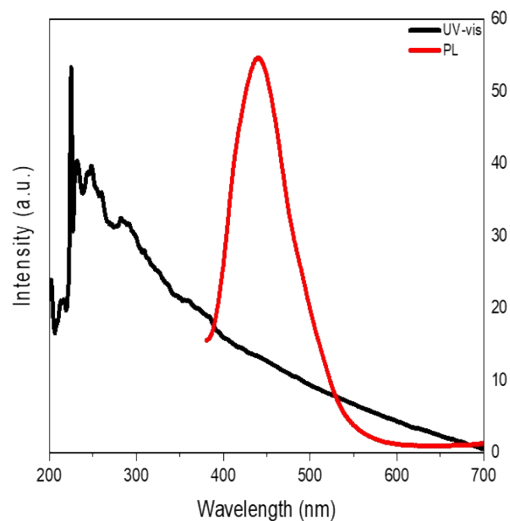

Figure S3. Photoluminescence and UV-vis spectra of HBP/LDH = (a) 2/1, (b) 1/1, and (c) 1/2.

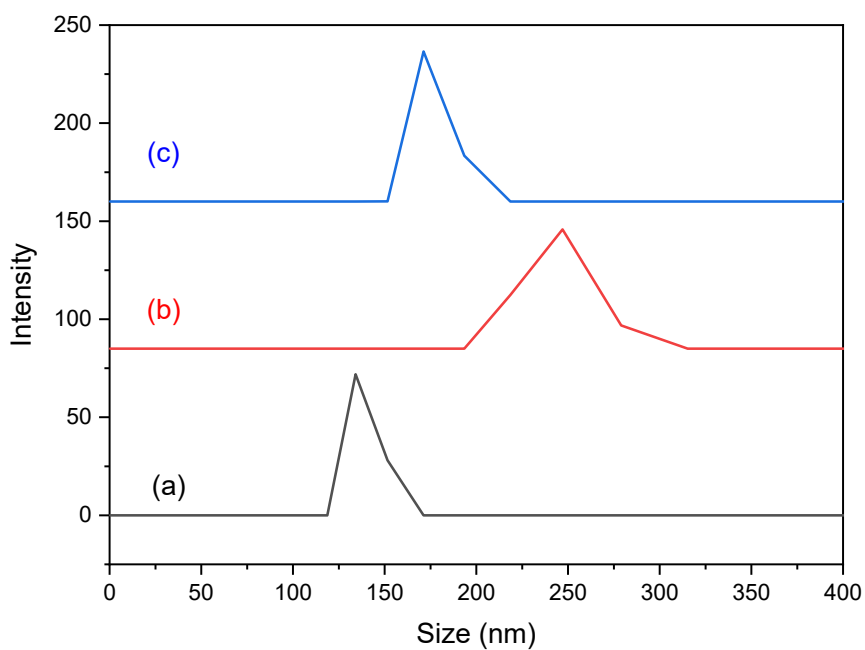

Figure S4. Average particle sizes of HBP/LDH = (a) 2/1, (b) 1/1, and (c) 1/2 (w/w).

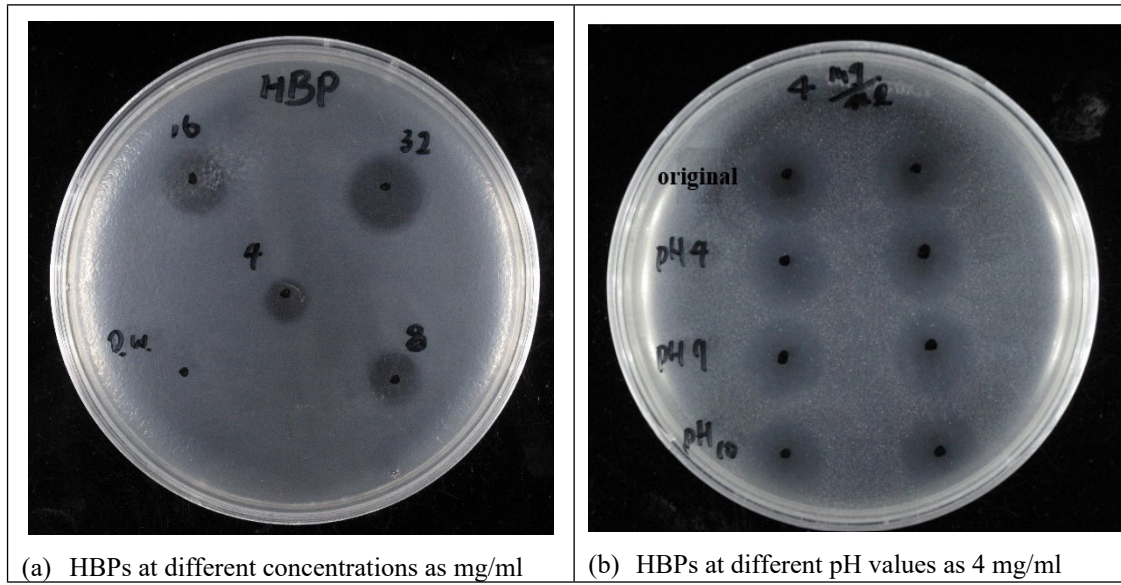

Figure S5. Inhibition zones at different (a) HBP concentrations and (b) pH values.
